# Supplementary material
Source: publisher site journal article supplement (http://study.sagepub.com/sites/default/files/Appendix_%20B_%20Paternoster.pdf)
Supplement: Supplementary file 1 [file Appendix_%20B_%20Paternoster.pdf]

# Appendix B

## *Statistical Tables*

Table B.1  
Table of Random Numbers

|       |       |       |       |       |       |       |       |       |       |       |       |       |
|-------|-------|-------|-------|-------|-------|-------|-------|-------|-------|-------|-------|-------|
| 16408 | 81899 | 04153 | 53381 | 79401 | 21438 | 83035 | 92350 | 36693 | 31238 | 59649 | 91754 | 72772 |
| 18629 | 81953 | 05520 | 91962 | 04739 | 13092 | 97662 | 24822 | 94730 | 06496 | 35090 | 04822 | 86774 |
| 73115 | 35101 | 47498 | 87637 | 99016 | 71060 | 88824 | 71013 | 18735 | 20286 | 23153 | 72924 | 35165 |
| 57491 | 16703 | 23167 | 49323 | 45021 | 33132 | 12944 | 41035 | 80780 | 45393 | 44812 | 12515 | 98931 |
| 30405 | 83946 | 23792 | 14422 | 15059 | 45799 | 22716 | 19792 | 09983 | 74353 | 68668 | 30429 | 70735 |
| 16631 | 35006 | 85900 | 98275 | 32388 | 52390 | 16815 | 69298 | 82732 | 38480 | 73817 | 32523 | 41961 |
| 96773 | 20206 | 42559 | 78985 | 05300 | 22164 | 24369 | 54224 | 35083 | 19687 | 11052 | 91491 | 60383 |
| 38935 | 64202 | 14349 | 82674 | 66523 | 44133 | 00697 | 35552 | 35970 | 19124 | 63318 | 29686 | 03387 |
| 31624 | 76384 | 17403 | 53363 | 44167 | 64486 | 64758 | 75366 | 76554 | 31601 | 12614 | 33072 | 60332 |
| 78919 | 19474 | 23632 | 27889 | 47914 | 02584 | 37680 | 20801 | 72152 | 39339 | 34806 | 08930 | 85001 |
| 03931 | 33309 | 57047 | 74211 | 63445 | 17361 | 62825 | 39908 | 05607 | 91284 | 68833 | 25570 | 38818 |
| 74426 | 33278 | 43972 | 10119 | 89917 | 15665 | 52872 | 73823 | 73144 | 88662 | 88970 | 74492 | 51805 |
| 09066 | 00903 | 20795 | 95452 | 92648 | 45454 | 09552 | 88815 | 16553 | 51125 | 79375 | 97596 | 16296 |
| 42238 | 12426 | 87025 | 14267 | 20979 | 04508 | 64535 | 31355 | 86064 | 29472 | 47689 | 05974 | 52468 |
| 16153 | 08002 | 26504 | 41744 | 81959 | 65642 | 74240 | 56302 | 00033 | 67107 | 77510 | 70625 | 28725 |
| 21457 | 40742 | 29820 | 96783 | 29400 | 21840 | 15035 | 34537 | 33310 | 06116 | 95240 | 15957 | 16572 |
| 21581 | 57802 | 02050 | 89728 | 17937 | 37621 | 47075 | 42080 | 97403 | 48626 | 68995 | 43805 | 33386 |
| 55612 | 78095 | 83197 | 33732 | 05810 | 24813 | 86902 | 60397 | 16489 | 03264 | 88525 | 42786 | 05269 |
| 44657 | 66999 | 99324 | 51281 | 84463 | 60563 | 79312 | 93454 | 68876 | 25471 | 93911 | 25650 | 12682 |
| 91340 | 84979 | 46949 | 81973 | 37949 | 61023 | 43997 | 15263 | 80644 | 43942 | 89203 | 71795 | 99533 |
| 91227 | 21199 | 31935 | 27022 | 84067 | 05462 | 35216 | 14486 | 29891 | 68607 | 41867 | 14951 | 91696 |
| 50001 | 38140 | 66321 | 19924 | 72163 | 09538 | 12151 | 06878 | 91903 | 18749 | 34405 | 56087 | 82790 |
| 65390 | 05224 | 72958 | 28609 | 81406 | 39147 | 25549 | 48542 | 42627 | 45233 | 57202 | 94617 | 23772 |
| 27504 | 96131 | 83944 | 41575 | 10573 | 08619 | 64482 | 73923 | 36152 | 05184 | 94142 | 25299 | 84387 |
| 37169 | 94851 | 39117 | 89632 | 00959 | 16487 | 65536 | 19071 | 39782 | 17095 | 02330 | 74301 | 00275 |
| 11508 | 70225 | 51111 | 38351 | 19444 | 66499 | 71945 | 05422 | 13442 | 78675 | 84081 | 66938 | 93654 |
| 37449 | 30362 | 06694 | 54690 | 04052 | 53115 | 62757 | 95348 | 78662 | 11163 | 81651 | 50245 | 34971 |
| 46515 | 70331 | 85922 | 38329 | 57015 | 15765 | 97161 | 17869 | 45349 | 61796 | 66345 | 81073 | 49106 |
| 30986 | 81223 | 42416 | 58353 | 21532 | 30502 | 32305 | 86482 | 06174 | 07901 | 54339 | 58861 | 74818 |
| 63798 | 64995 | 46583 | 09785 | 44160 | 78128 | 83391 | 42865 | 92520 | 83531 | 80377 | 35909 | 81250 |

|       |       |       |       |       |       |       |       |       |       |       |       |       |
|-------|-------|-------|-------|-------|-------|-------|-------|-------|-------|-------|-------|-------|
| 82486 | 84846 | 99254 | 67632 | 43218 | 50076 | 21361 | 64816 | 51202 | 88124 | 41870 | 52689 | 51275 |
| 21885 | 32906 | 92431 | 09060 | 64297 | 51674 | 64126 | 62570 | 26123 | 05155 | 59194 | 52799 | 28225 |
| 60336 | 98782 | 07408 | 53458 | 13564 | 59089 | 26445 | 29789 | 85205 | 41001 | 12535 | 12133 | 14645 |
| 43937 | 46891 | 24010 | 25560 | 86355 | 33941 | 25786 | 54990 | 71899 | 15475 | 95434 | 98227 | 21824 |
| 97656 | 63175 | 89303 | 16275 | 07100 | 92063 | 21942 | 18611 | 47348 | 20203 | 18534 | 03862 | 78095 |
| 03299 | 01221 | 05418 | 38982 | 55758 | 92237 | 26759 | 86367 | 21216 | 98442 | 08303 | 56613 | 91511 |
| 79626 | 06486 | 03574 | 17668 | 07785 | 76020 | 79924 | 25651 | 83325 | 88428 | 85076 | 72811 | 22717 |
| 85636 | 68335 | 47539 | 03129 | 65651 | 11977 | 02510 | 26113 | 99447 | 68645 | 34327 | 15152 | 55230 |
| 18039 | 14367 | 61337 | 06177 | 12143 | 46609 | 32989 | 74014 | 64708 | 00533 | 35398 | 58408 | 13261 |
| 08362 | 15656 | 60627 | 36478 | 65648 | 16764 | 53412 | 09013 | 07832 | 41574 | 17639 | 82163 | 60859 |
| 79556 | 29068 | 04142 | 16268 | 15387 | 12856 | 66227 | 38358 | 22478 | 73373 | 88732 | 09443 | 82558 |
| 92608 | 82674 | 27072 | 32534 | 17075 | 27698 | 98204 | 63863 | 11951 | 34648 | 88022 | 56148 | 34925 |
| 23982 | 25835 | 40055 | 67006 | 12293 | 02753 | 14827 | 23235 | 35071 | 99704 | 37543 | 11601 | 35503 |
| 09915 | 96306 | 05908 | 97901 | 28395 | 14186 | 00821 | 80703 | 70426 | 75647 | 76310 | 88717 | 37890 |
| 59037 | 33300 | 26695 | 62247 | 69927 | 76123 | 50842 | 43834 | 86654 | 70959 | 79725 | 93872 | 28117 |
| 42488 | 78077 | 69882 | 61657 | 34136 | 79180 | 97526 | 43092 | 04098 | 73571 | 80799 | 76536 | 71255 |
| 46764 | 86273 | 63003 | 93017 | 31204 | 36692 | 40202 | 35275 | 57306 | 55543 | 53203 | 18098 | 47625 |
| 03237 | 45430 | 55417 | 63282 | 90816 | 17349 | 88298 | 90183 | 36600 | 78406 | 06216 | 95787 | 42579 |
| 86591 | 81482 | 52667 | 61582 | 14972 | 90053 | 89534 | 76036 | 49199 | 43716 | 97548 | 04379 | 46370 |
| 38534 | 01715 | 94964 | 87288 | 65680 | 43772 | 39560 | 12918 | 86537 | 62738 | 19636 | 51132 | 25739 |

Source: Adapted with permission from Beyer, W. H. (Ed.). 1991. *CRC Standard Probability and Statistics: Tables and Formulae, XII.3*. Boca Raton, FL: CRC Press.

**Table B.2 Area Under the Standard Normal Curve (z Distribution)\***

| z   | .00   | .01   | .02   | .03   | .04   | .05   | .06   | .07   | .08   | .09   |
|-----|-------|-------|-------|-------|-------|-------|-------|-------|-------|-------|
| 0.0 | .0000 | .0040 | .0080 | .0120 | .0160 | .0199 | .0239 | .0279 | .0319 | .0359 |
| 0.1 | .0398 | .0438 | .0478 | .0517 | .0557 | .0596 | .0636 | .0675 | .0714 | .0753 |
| 0.2 | .0793 | .0832 | .0871 | .0910 | .0948 | .0987 | .1026 | .1064 | .1103 | .1141 |
| 0.3 | .1179 | .1217 | .1255 | .1293 | .1331 | .1368 | .1406 | .1443 | .1480 | .1517 |
| 0.4 | .1554 | .1591 | .1628 | .1664 | .1700 | .1736 | .1772 | .1808 | .1844 | .1879 |
| 0.5 | .1915 | .1950 | .1985 | .2019 | .2054 | .2088 | .2123 | .2157 | .2190 | .2224 |
| 0.6 | .2257 | .2291 | .2324 | .2357 | .2389 | .2422 | .2454 | .2486 | .2517 | .2549 |
| 0.7 | .2580 | .2611 | .2642 | .2673 | .2704 | .2734 | .2764 | .2794 | .2823 | .2852 |
| 0.8 | .2881 | .2910 | .2939 | .2967 | .2995 | .3023 | .3051 | .3078 | .3106 | .3133 |
| 0.9 | .3159 | .3186 | .3212 | .3238 | .3264 | .3289 | .3315 | .3340 | .3365 | .3389 |
| 1.0 | .3413 | .3438 | .3461 | .3485 | .3508 | .3531 | .3554 | .3577 | .3599 | .3621 |
| 1.1 | .3643 | .3665 | .3686 | .3708 | .3729 | .3749 | .3770 | .3790 | .3810 | .3830 |
| 1.2 | .3849 | .3869 | .3888 | .3907 | .3925 | .3944 | .3962 | .3980 | .3997 | .4015 |
| 1.3 | .4032 | .4049 | .4066 | .4082 | .4099 | .4115 | .4131 | .4147 | .4162 | .4177 |
| 1.4 | .4192 | .4207 | .4222 | .4236 | .4251 | .4265 | .4279 | .4292 | .4306 | .4319 |
| 1.5 | .4332 | .4345 | .4357 | .4370 | .4382 | .4394 | .4406 | .4418 | .4429 | .4441 |
| 1.6 | .4452 | .4463 | .4474 | .4484 | .4495 | .4505 | .4515 | .4525 | .4535 | .4545 |
| 1.7 | .4554 | .4564 | .4573 | .4582 | .4591 | .4599 | .4608 | .4616 | .4625 | .4633 |
| 1.8 | .4641 | .4649 | .4656 | .4664 | .4671 | .4678 | .4686 | .4693 | .4699 | .4706 |
| 1.9 | .4713 | .4719 | .4726 | .4732 | .4738 | .4744 | .4750 | .4756 | .4761 | .4767 |
| 2.0 | .4772 | .4778 | .4783 | .4788 | .4793 | .4798 | .4803 | .4808 | .4812 | .4817 |
| 2.1 | .4821 | .4826 | .4830 | .4834 | .4838 | .4842 | .4846 | .4850 | .4854 | .4857 |
| 2.2 | .4861 | .4864 | .4868 | .4871 | .4875 | .4878 | .4881 | .4884 | .4887 | .4890 |
| 2.3 | .4893 | .4896 | .4898 | .4901 | .4904 | .4906 | .4909 | .4911 | .4913 | .4916 |
| 2.4 | .4918 | .4920 | .4922 | .4925 | .4927 | .4929 | .4931 | .4932 | .4934 | .4936 |
| 2.5 | .4938 | .4940 | .4941 | .4943 | .4945 | .4946 | .4948 | .4949 | .4951 | .4952 |
| 2.6 | .4953 | .4955 | .4956 | .4957 | .4959 | .4960 | .4961 | .4962 | .4963 | .4964 |
| 2.7 | .4965 | .4966 | .4967 | .4968 | .4969 | .4970 | .4971 | .4972 | .4973 | .4974 |
| 2.8 | .4974 | .4975 | .4976 | .4977 | .4977 | .4978 | .4979 | .4979 | .4980 | .4981 |
| 2.9 | .4981 | .4982 | .4982 | .4983 | .4984 | .4984 | .4985 | .4985 | .4986 | .4986 |
| 3.0 | .4987 | .4987 | .4987 | .4988 | .4988 | .4989 | .4989 | .4989 | .4990 | .4990 |

Source: Adapted with permission from Frederick Mosteller and Robert E. K. Rourke, 1973. *Sturdy Statistics*. Table A-1. Reading, MA: Addison-Wesley.

\*Proportion of the area under the normal curve corresponding to the distance between the mean (0) and a point that is z standard deviation units away from the mean.

**Table B.3** The *t* Distribution

|          | Level of Significance for a One-Tailed Test |       |        |        |        |         |
|----------|---------------------------------------------|-------|--------|--------|--------|---------|
|          | .10                                         | .05   | .025   | .01    | .005   | .0005   |
|          | Level of Significance for a Two-Tailed Test |       |        |        |        |         |
|          | .20                                         | .10   | .05    | .02    | .01    | .001    |
| 1        | 3.078                                       | 6.314 | 12.706 | 31.821 | 63.657 | 636.619 |
| 2        | 1.886                                       | 2.920 | 4.303  | 6.965  | 9.925  | 31.598  |
| 3        | 1.638                                       | 2.353 | 3.182  | 4.541  | 5.841  | 12.941  |
| 4        | 1.533                                       | 2.132 | 2.776  | 3.747  | 4.604  | 8.610   |
| 5        | 1.476                                       | 2.015 | 2.571  | 3.365  | 4.032  | 6.859   |
| 6        | 1.440                                       | 1.943 | 2.447  | 3.143  | 3.707  | 5.959   |
| 7        | 1.415                                       | 1.895 | 2.365  | 2.998  | 3.499  | 5.405   |
| 8        | 1.397                                       | 1.860 | 2.306  | 2.896  | 3.355  | 5.041   |
| 9        | 1.383                                       | 1.833 | 2.262  | 2.821  | 3.250  | 4.781   |
| 10       | 1.372                                       | 1.812 | 2.228  | 2.764  | 3.169  | 4.587   |
| 11       | 1.363                                       | 1.796 | 2.201  | 2.718  | 3.106  | 4.437   |
| 12       | 1.356                                       | 1.782 | 2.179  | 2.681  | 3.055  | 4.318   |
| 13       | 1.350                                       | 1.771 | 2.160  | 2.650  | 3.012  | 4.221   |
| 14       | 1.345                                       | 1.761 | 2.145  | 2.624  | 2.977  | 4.140   |
| 15       | 1.341                                       | 1.753 | 2.131  | 2.602  | 2.947  | 4.073   |
| 16       | 1.337                                       | 1.746 | 2.120  | 2.583  | 2.921  | 4.015   |
| 17       | 1.333                                       | 1.740 | 2.110  | 2.567  | 2.898  | 3.965   |
| 18       | 1.330                                       | 1.734 | 2.101  | 2.552  | 2.878  | 3.922   |
| 19       | 1.328                                       | 1.729 | 2.093  | 2.539  | 2.861  | 3.883   |
| 20       | 1.325                                       | 1.725 | 2.086  | 2.528  | 2.845  | 3.850   |
| 21       | 1.323                                       | 1.721 | 2.080  | 2.518  | 2.831  | 3.819   |
| 22       | 1.321                                       | 1.717 | 2.074  | 2.508  | 2.819  | 3.792   |
| 23       | 1.319                                       | 1.714 | 2.069  | 2.500  | 2.807  | 3.767   |
| 24       | 1.318                                       | 1.711 | 2.064  | 2.492  | 2.797  | 3.745   |
| 25       | 1.316                                       | 1.708 | 2.060  | 2.485  | 2.787  | 3.725   |
| 26       | 1.315                                       | 1.706 | 2.056  | 2.479  | 2.779  | 3.707   |
| 27       | 1.314                                       | 1.703 | 2.052  | 2.473  | 2.771  | 3.690   |
| 28       | 1.313                                       | 1.701 | 2.048  | 2.467  | 2.763  | 3.674   |
| 29       | 1.311                                       | 1.699 | 2.045  | 2.462  | 2.756  | 3.659   |
| 30       | 1.310                                       | 1.697 | 2.042  | 2.457  | 2.750  | 3.646   |
| 40       | 1.303                                       | 1.684 | 2.021  | 2.423  | 2.704  | 3.551   |
| 60       | 1.206                                       | 1.671 | 2.000  | 2.390  | 2.660  | 3.460   |
| 120      | 1.289                                       | 1.658 | 1.980  | 2.358  | 2.617  | 3.373   |
| $\infty$ | 1.282                                       | 1.645 | 1.960  | 2.326  | 2.576  | 3.291   |

Source: Table B.3 is adapted with permission from Table III of R. A. Fisher and F. Yates, *Statistical Tables for Biological, Agricultural and Medical Research* (6th ed.). Published by Longman Group UK Ltd., 1974.

**Table B.4** Critical Values of the Chi-Square Statistic at the .05 and .01 Significance Levels

| Area to the Right of the Critical Value |                       |        | Area to the Right of the Critical Value |                       |         |
|-----------------------------------------|-----------------------|--------|-----------------------------------------|-----------------------|---------|
| df                                      | Level of Significance |        | df                                      | Level of Significance |         |
|                                         | .05                   | .01    |                                         | .05                   | .01     |
| 1                                       | 3.841                 | 6.635  | 21                                      | 32.671                | 38.932  |
| 2                                       | 5.991                 | 9.210  | 22                                      | 33.924                | 40.289  |
| 3                                       | 7.815                 | 11.345 | 23                                      | 33.924                | 40.289  |
| 4                                       | 9.488                 | 13.277 | 24                                      | 36.415                | 42.980  |
| 5                                       | 11.070                | 15.086 | 25                                      | 37.652                | 44.314  |
| 6                                       | 12.592                | 16.812 | 26                                      | 38.885                | 45.642  |
| 7                                       | 14.067                | 18.475 | 27                                      | 40.113                | 46.963  |
| 8                                       | 15.507                | 20.090 | 28                                      | 41.337                | 48.278  |
| 9                                       | 16.919                | 21.666 | 29                                      | 42.557                | 49.588  |
| 10                                      | 18.307                | 23.209 | 30                                      | 43.773                | 50.892  |
| 11                                      | 19.675                | 24.725 | 40                                      | 55.758                | 63.691  |
| 12                                      | 21.026                | 26.217 | 50                                      | 67.505                | 76.154  |
| 13                                      | 22.362                | 27.688 | 60                                      | 79.082                | 88.379  |
| 14                                      | 23.685                | 29.141 | 70                                      | 90.531                | 100.425 |
| 15                                      | 24.996                | 30.578 | 80                                      | 101.879               | 112.329 |
| 16                                      | 26.296                | 32.000 | 90                                      | 113.145               | 124.116 |
| 17                                      | 27.587                | 33.409 | 100                                     | 124.342               | 135.807 |
| 18                                      | 28.869                | 34.805 |                                         |                       |         |
| 19                                      | 30.144                | 36.191 |                                         |                       |         |
| 20                                      | 31.410                | 37.566 |                                         |                       |         |

Source: Adapted from Donald Owen, *Handbook of Statistical Tables*, © 1962 by Addison-Wesley Publishing Company, Inc. Reprinted by permission of Addison-Wesley Publishing Company, Inc.

Table B.5a The F Distribution ( $\alpha = .01$  in the right tail)

| df (between)<br>df (within)    | Numerator Degrees of Freedom |        |        |        |        |        |        |        |        |        |
|--------------------------------|------------------------------|--------|--------|--------|--------|--------|--------|--------|--------|--------|
|                                | 1                            | 2      | 3      | 4      | 5      | 6      | 7      | 8      | 9      |        |
| Denominator Degrees of Freedom | 1                            | 4052.2 | 4999.5 | 5403.4 | 5624.6 | 5763.6 | 5859.0 | 5928.4 | 5981.1 | 6022.5 |
|                                | 2                            | 98.503 | 99.000 | 99.166 | 99.249 | 99.299 | 99.333 | 99.356 | 99.374 | 99.388 |
|                                | 3                            | 34.116 | 30.817 | 29.457 | 28.710 | 28.237 | 27.911 | 27.672 | 27.489 | 27.345 |
|                                | 4                            | 21.198 | 18.000 | 16.694 | 15.977 | 15.522 | 15.207 | 14.976 | 14.799 | 14.659 |
|                                | 5                            | 16.258 | 13.274 | 12.060 | 11.392 | 10.967 | 10.672 | 10.456 | 10.289 | 10.158 |
|                                | 6                            | 13.745 | 10.925 | 9.7795 | 9.1483 | 8.7459 | 8.4661 | 8.2600 | 8.1017 | 7.9761 |
|                                | 7                            | 12.246 | 9.5466 | 8.4513 | 7.8466 | 7.4604 | 7.1914 | 6.9928 | 6.8400 | 6.7188 |
|                                | 8                            | 11.259 | 8.6491 | 7.5910 | 7.0061 | 6.6318 | 6.3707 | 6.1776 | 6.0289 | 5.9106 |
|                                | 9                            | 10.561 | 8.0215 | 6.9919 | 6.4221 | 6.0569 | 5.8018 | 5.6129 | 5.4671 | 5.3511 |
|                                | 10                           | 10.044 | 7.5594 | 6.5523 | 5.9943 | 5.6363 | 5.3858 | 5.2001 | 5.0567 | 4.9424 |
|                                | 11                           | 9.6460 | 7.2057 | 6.2167 | 5.6683 | 5.3160 | 5.0692 | 4.8861 | 4.7445 | 4.6315 |
|                                | 12                           | 9.3302 | 6.9266 | 5.9525 | 5.4120 | 5.0643 | 4.8206 | 4.6395 | 4.4994 | 4.3875 |
|                                | 13                           | 9.0738 | 6.7010 | 5.7394 | 5.2053 | 4.8616 | 4.6204 | 4.4410 | 4.3021 | 4.1911 |
|                                | 14                           | 8.8616 | 6.5149 | 5.5639 | 5.0354 | 4.6950 | 4.4558 | 4.2779 | 4.1399 | 4.0297 |
|                                | 15                           | 8.6831 | 6.3589 | 5.4170 | 4.8932 | 4.5556 | 4.3183 | 4.1415 | 4.0045 | 3.8948 |
|                                | 16                           | 8.5310 | 6.2262 | 5.2922 | 4.7726 | 4.4374 | 4.2016 | 4.0259 | 3.8896 | 3.7804 |
|                                | 17                           | 8.3997 | 6.1121 | 5.1850 | 4.6690 | 4.3359 | 4.1015 | 3.9267 | 3.7910 | 3.6822 |
|                                | 18                           | 8.2854 | 6.0129 | 5.0919 | 4.5790 | 4.2479 | 4.0146 | 3.8406 | 3.7054 | 3.5971 |
|                                | 19                           | 8.1849 | 5.9259 | 5.0103 | 4.5003 | 4.1708 | 3.9386 | 3.7653 | 3.6305 | 3.5225 |
|                                | 20                           | 8.0960 | 5.8489 | 4.9382 | 4.4307 | 4.1027 | 3.8714 | 3.6987 | 3.5644 | 3.4567 |
|                                | 21                           | 8.0166 | 5.7804 | 4.8740 | 4.3688 | 4.0421 | 3.8117 | 3.6396 | 3.5056 | 3.3981 |
|                                | 22                           | 7.9454 | 5.7190 | 4.8166 | 4.3134 | 3.9880 | 3.7583 | 3.5867 | 3.4530 | 3.3458 |
|                                | 23                           | 7.8811 | 5.6637 | 4.7649 | 4.2636 | 3.9392 | 3.7102 | 3.5390 | 3.4057 | 3.2986 |
|                                | 24                           | 7.8229 | 5.6136 | 4.7181 | 4.2184 | 3.8951 | 3.6667 | 3.4959 | 3.3629 | 3.2560 |
|                                | 25                           | 7.7698 | 5.5680 | 4.6755 | 4.1774 | 3.8550 | 3.6272 | 3.4568 | 3.3239 | 3.2172 |
|                                | 26                           | 7.7213 | 5.5263 | 4.6366 | 4.1400 | 3.8183 | 3.5911 | 3.4210 | 3.2884 | 3.1818 |
|                                | 27                           | 7.6767 | 5.4881 | 4.6009 | 4.1056 | 3.7848 | 3.5580 | 3.3882 | 3.2558 | 3.1494 |
|                                | 28                           | 7.6356 | 5.4529 | 4.5681 | 4.0740 | 3.7539 | 3.5276 | 3.3581 | 3.2259 | 3.1195 |
|                                | 29                           | 7.5977 | 5.4204 | 4.5378 | 4.0449 | 3.7254 | 3.4995 | 3.3303 | 3.1982 | 3.0920 |
|                                | 30                           | 7.5625 | 5.3903 | 4.5097 | 4.0179 | 3.6990 | 3.4735 | 3.3045 | 3.1726 | 3.0665 |
| 40                             | 7.3141                       | 5.1785 | 4.3126 | 3.8283 | 3.5138 | 3.2910 | 3.1238 | 2.9930 | 2.8876 |        |
| 60                             | 7.0771                       | 4.9774 | 4.1259 | 3.6490 | 3.3389 | 3.1187 | 2.9530 | 2.8233 | 2.7185 |        |
| 120                            | 6.8509                       | 4.7865 | 3.9491 | 3.4795 | 3.1735 | 2.9559 | 2.7918 | 2.6629 | 2.5586 |        |
| $\infty$                       | 6.6349                       | 4.6052 | 3.7816 | 3.3192 | 3.0173 | 2.8020 | 2.6393 | 2.5113 | 2.4073 |        |

**Table B.5b** The F Distribution ( $\alpha = .01$  in the right tail)

| <i>df (between)<br/>df (within)</i> | <i>Numerator Degrees of Freedom</i> |        |        |        |        |        |        |        |        |          |
|-------------------------------------|-------------------------------------|--------|--------|--------|--------|--------|--------|--------|--------|----------|
|                                     | 10                                  | 12     | 15     | 20     | 24     | 30     | 40     | 60     | 120    | $\infty$ |
| 1                                   | 241.88                              | 243.91 | 245.95 | 248.01 | 249.05 | 250.10 | 251.14 | 252.20 | 253.25 | 254.31   |
| 2                                   | 19.396                              | 19.413 | 19.429 | 19.446 | 19.454 | 19.462 | 19.471 | 19.479 | 19.487 | 19.496   |
| 3                                   | 8.7855                              | 8.7446 | 8.7029 | 8.6602 | 8.6385 | 8.6166 | 8.5944 | 8.5720 | 8.5494 | 8.5264   |
| 4                                   | 5.9644                              | 5.9117 | 5.8578 | 5.8025 | 5.7744 | 5.7459 | 5.7170 | 5.6877 | 5.6581 | 5.6281   |
| 5                                   | 4.7351                              | 4.6777 | 4.6188 | 4.5581 | 4.5272 | 4.4957 | 4.4638 | 4.4314 | 4.3985 | 4.3650   |
| 6                                   | 4.0600                              | 3.9999 | 3.9381 | 3.8742 | 3.8415 | 3.8082 | 3.7743 | 3.7398 | 3.7047 | 3.6689   |
| 7                                   | 3.6365                              | 3.5747 | 3.5107 | 3.4445 | 3.4105 | 3.1758 | 3.3404 | 3.3043 | 3.2674 | 3.2298   |
| 8                                   | 3.3472                              | 3.2839 | 3.2184 | 3.1503 | 3.1152 | 3.0794 | 3.0428 | 3.0053 | 2.9669 | 2.9276   |
| 9                                   | 3.1373                              | 3.0729 | 3.0061 | 2.9365 | 2.9005 | 2.8617 | 2.8259 | 2.7872 | 2.7475 | 2.7067   |
| 10                                  | 2.9782                              | 2.9110 | 2.8450 | 2.7740 | 2.7372 | 2.6996 | 2.6609 | 2.6211 | 2.5801 | 2.5379   |
| 11                                  | 2.8536                              | 2.7876 | 2.7186 | 2.6464 | 2.6090 | 2.5705 | 2.5309 | 2.4901 | 2.4480 | 2.4045   |
| 12                                  | 2.7534                              | 2.6866 | 2.6169 | 2.5436 | 2.5055 | 2.4663 | 2.4259 | 2.3842 | 2.3410 | 2.2962   |
| 13                                  | 2.6710                              | 2.6037 | 2.5331 | 2.4589 | 2.4202 | 2.1801 | 2.3392 | 2.2966 | 2.2524 | 2.2064   |
| 14                                  | 2.6022                              | 2.5342 | 2.4630 | 2.3879 | 2.3487 | 2.1082 | 2.2664 | 2.2229 | 2.1778 | 2.1307   |
| 15                                  | 2.5437                              | 2.4753 | 2.4034 | 2.3275 | 2.2878 | 2.2468 | 2.2043 | 2.1601 | 2.1141 | 2.0658   |
| 16                                  | 2.4935                              | 2.4247 | 2.3522 | 2.2756 | 2.2354 | 2.1938 | 2.1507 | 2.1058 | 2.0589 | 2.0096   |
| 17                                  | 2.4499                              | 2.3807 | 2.3077 | 2.2304 | 2.1898 | 2.1477 | 2.1040 | 2.0584 | 2.0107 | 1.9604   |
| 18                                  | 2.4117                              | 2.3421 | 2.2686 | 2.1906 | 2.1497 | 2.1071 | 2.0629 | 2.0166 | 1.9681 | 1.9168   |
| 19                                  | 2.3779                              | 2.3080 | 2.2341 | 2.1555 | 2.1141 | 2.0712 | 2.0264 | 1.9795 | 1.9302 | 1.8780   |
| 20                                  | 2.3479                              | 2.2776 | 2.2033 | 2.1242 | 2.0825 | 2.0391 | 1.9938 | 1.9464 | 1.8963 | 1.8432   |
| 21                                  | 2.3210                              | 2.2504 | 2.1757 | 2.0960 | 2.0540 | 2.0102 | 1.9645 | 1.9165 | 1.8657 | 1.8117   |
| 22                                  | 2.2967                              | 2.2258 | 2.1508 | 2.0707 | 2.0283 | 1.9842 | 1.9380 | 1.8894 | 1.8380 | 1.7831   |
| 23                                  | 2.2747                              | 2.2036 | 2.1282 | 2.0476 | 2.0050 | 1.9605 | 1.9139 | 1.8648 | 1.8128 | 1.7570   |
| 24                                  | 2.2547                              | 2.1834 | 2.1077 | 2.0267 | 1.9838 | 1.9390 | 1.8920 | 1.8424 | 1.7896 | 1.7330   |
| 25                                  | 2.2365                              | 2.1649 | 2.0889 | 2.0075 | 1.9643 | 1.9192 | 1.8718 | 1.8217 | 1.7684 | 1.7110   |
| 26                                  | 2.2197                              | 2.1479 | 2.0716 | 1.9898 | 1.9464 | 1.9010 | 1.8533 | 1.8027 | 1.7488 | 1.6906   |
| 27                                  | 2.2043                              | 2.1323 | 2.0558 | 1.9736 | 1.9299 | 1.8842 | 1.8361 | 1.7851 | 1.7306 | 1.6717   |
| 28                                  | 2.1900                              | 2.1179 | 2.0411 | 1.9586 | 1.9147 | 1.8687 | 1.8203 | 1.7689 | 1.7138 | 1.6541   |
| 29                                  | 2.1768                              | 2.1045 | 2.0275 | 1.9446 | 1.9005 | 1.8543 | 1.8055 | 1.7537 | 1.6981 | 1.6376   |
| 30                                  | 2.1646                              | 2.0921 | 2.0148 | 1.9317 | 1.8874 | 1.8409 | 1.7918 | 1.7396 | 1.6835 | 1.6223   |
| 40                                  | 2.0772                              | 2.0035 | 1.9245 | 1.8389 | 1.7929 | 1.7444 | 1.6928 | 1.6373 | 1.5766 | 1.5089   |
| 60                                  | 1.9926                              | 1.9174 | 1.8364 | 1.7480 | 1.7001 | 1.6491 | 1.5943 | 1.5343 | 1.4673 | 1.3893   |
| 120                                 | 1.9105                              | 1.8337 | 1.7505 | 1.6587 | 1.6084 | 1.5543 | 1.4952 | 1.4290 | 1.3519 | 1.2539   |
| $\infty$                            | 1.8307                              | 1.7522 | 1.6664 | 1.5705 | 1.5173 | 1.4591 | 1.3940 | 1.3180 | 1.2214 | 1.0000   |



**Table B.6** The Studentized Range Statistic,  $q$

|          |               | $q$ Value When Alpha = .05 |      |      |      |      |      |      |      |      |      |      |       |       |       |       |       |       |       |       |
|----------|---------------|----------------------------|------|------|------|------|------|------|------|------|------|------|-------|-------|-------|-------|-------|-------|-------|-------|
| $k$      | $df$ (within) | 2                          | 3    | 4    | 5    | 6    | 7    | 8    | 9    | 10   | 11   | 12   | 13    | 14    | 15    | 16    | 17    | 18    | 19    | 20    |
| 1        |               | 18.0                       | 27.0 | 32.8 | 37.1 | 40.4 | 43.1 | 45.4 | 47.4 | 49.1 | 50.6 | 52.0 | 53.2  | 54.3  | 55.4  | 56.3  | 57.2  | 58.0  | 58.8  | 59.6  |
| 2        |               | 6.09                       | 8.3  | 9.8  | 10.9 | 11.7 | 12.4 | 13.0 | 13.5 | 14.0 | 14.4 | 14.7 | 15.1  | 15.4  | 15.7  | 15.9  | 16.1  | 16.4  | 16.6  | 16.8  |
| 3        |               | 4.50                       | 5.91 | 6.82 | 7.50 | 8.04 | 8.48 | 8.85 | 9.18 | 9.46 | 9.72 | 9.95 | 10.15 | 10.35 | 10.52 | 10.69 | 10.84 | 10.98 | 11.11 | 11.24 |
| 4        |               | 3.93                       | 5.04 | 5.76 | 6.29 | 6.71 | 7.05 | 7.35 | 7.60 | 7.83 | 8.03 | 8.21 | 8.37  | 8.52  | 8.66  | 8.79  | 8.91  | 9.03  | 9.13  | 9.23  |
| 5        |               | 3.64                       | 4.60 | 5.22 | 5.67 | 6.03 | 6.33 | 6.58 | 6.80 | 6.99 | 7.17 | 7.32 | 7.47  | 7.60  | 7.72  | 7.83  | 7.93  | 8.03  | 8.12  | 8.21  |
| 6        |               | 3.46                       | 4.34 | 4.90 | 5.31 | 5.63 | 5.89 | 6.12 | 6.32 | 6.49 | 6.65 | 6.79 | 6.92  | 7.03  | 7.14  | 7.24  | 7.34  | 7.43  | 7.51  | 7.59  |
| 7        |               | 3.34                       | 4.16 | 4.68 | 5.06 | 5.36 | 5.61 | 5.82 | 6.00 | 6.16 | 6.30 | 6.43 | 6.55  | 6.66  | 6.76  | 6.85  | 6.94  | 7.02  | 7.09  | 7.17  |
| 8        |               | 3.26                       | 4.04 | 4.53 | 4.89 | 5.17 | 5.40 | 5.60 | 5.77 | 5.92 | 6.05 | 6.18 | 6.29  | 6.39  | 6.48  | 6.57  | 6.65  | 6.73  | 6.80  | 6.87  |
| 9        |               | 3.20                       | 3.95 | 4.42 | 4.76 | 5.02 | 5.24 | 5.43 | 5.60 | 5.74 | 5.87 | 5.98 | 6.09  | 6.19  | 6.28  | 6.36  | 6.44  | 6.51  | 6.58  | 6.64  |
| 10       |               | 3.15                       | 3.88 | 4.33 | 4.65 | 4.91 | 5.12 | 5.30 | 5.46 | 5.60 | 5.72 | 5.83 | 5.93  | 6.03  | 6.11  | 6.20  | 6.27  | 6.34  | 6.40  | 6.47  |
| 11       |               | 3.11                       | 3.82 | 4.26 | 4.57 | 4.82 | 5.03 | 5.20 | 5.35 | 5.49 | 5.61 | 5.71 | 5.81  | 5.90  | 5.99  | 6.06  | 6.14  | 6.20  | 6.26  | 6.33  |
| 12       |               | 3.08                       | 3.77 | 4.20 | 4.51 | 4.75 | 4.95 | 5.12 | 5.27 | 5.40 | 5.51 | 5.62 | 5.71  | 5.80  | 5.88  | 5.95  | 6.03  | 6.09  | 6.15  | 6.21  |
| 13       |               | 3.06                       | 3.73 | 4.15 | 4.45 | 4.69 | 4.88 | 5.05 | 5.19 | 5.32 | 5.43 | 5.53 | 5.63  | 5.71  | 5.79  | 5.86  | 5.93  | 6.00  | 6.05  | 6.11  |
| 14       |               | 3.03                       | 3.70 | 4.11 | 4.41 | 4.64 | 4.83 | 4.99 | 5.13 | 5.25 | 5.36 | 5.46 | 5.55  | 5.64  | 5.72  | 5.79  | 5.85  | 5.92  | 5.97  | 6.03  |
| 15       |               | 3.01                       | 3.67 | 4.08 | 4.37 | 4.60 | 4.78 | 4.94 | 5.08 | 5.20 | 5.31 | 5.40 | 5.49  | 5.58  | 5.65  | 5.72  | 5.79  | 5.85  | 5.90  | 5.96  |
| 16       |               | 3.00                       | 3.65 | 4.05 | 4.33 | 4.56 | 4.74 | 4.90 | 5.03 | 5.15 | 5.26 | 5.35 | 5.44  | 5.52  | 5.59  | 5.66  | 5.72  | 5.79  | 5.84  | 5.90  |
| 17       |               | 2.98                       | 3.63 | 4.02 | 4.30 | 4.52 | 4.71 | 4.86 | 4.99 | 5.11 | 5.21 | 5.31 | 5.39  | 5.47  | 5.55  | 5.61  | 5.68  | 5.74  | 5.79  | 5.84  |
| 18       |               | 2.97                       | 3.61 | 4.00 | 4.28 | 4.49 | 4.67 | 4.82 | 4.96 | 5.07 | 5.17 | 5.27 | 5.35  | 5.43  | 5.50  | 5.57  | 5.63  | 5.69  | 5.74  | 5.79  |
| 19       |               | 2.96                       | 3.59 | 3.98 | 4.25 | 4.47 | 4.65 | 4.79 | 4.92 | 5.04 | 5.14 | 5.23 | 5.32  | 5.39  | 5.46  | 5.53  | 5.59  | 5.65  | 5.70  | 5.75  |
| 20       |               | 2.95                       | 3.58 | 3.96 | 4.23 | 4.45 | 4.62 | 4.77 | 4.90 | 5.01 | 5.11 | 5.20 | 5.28  | 5.36  | 5.43  | 5.49  | 5.55  | 5.61  | 5.66  | 5.71  |
| 24       |               | 2.92                       | 3.53 | 3.90 | 4.17 | 4.37 | 4.54 | 4.68 | 4.81 | 4.92 | 5.01 | 5.10 | 5.18  | 5.25  | 5.32  | 5.38  | 5.44  | 5.50  | 5.54  | 5.59  |
| 30       |               | 2.89                       | 3.49 | 3.84 | 4.10 | 4.30 | 4.46 | 4.60 | 4.72 | 4.83 | 4.92 | 5.00 | 5.08  | 5.15  | 5.21  | 5.27  | 5.33  | 5.38  | 5.43  | 5.48  |
| 40       |               | 2.86                       | 3.44 | 3.79 | 4.04 | 4.23 | 4.39 | 4.52 | 4.63 | 4.74 | 4.82 | 4.91 | 4.98  | 5.05  | 5.11  | 5.16  | 5.22  | 5.27  | 5.31  | 5.36  |
| 60       |               | 2.83                       | 3.40 | 3.74 | 3.98 | 4.16 | 4.31 | 4.44 | 4.55 | 4.65 | 4.73 | 4.81 | 4.88  | 4.94  | 5.00  | 5.06  | 5.11  | 5.16  | 5.20  | 5.24  |
| 120      |               | 2.80                       | 3.36 | 3.69 | 3.92 | 4.10 | 4.24 | 4.36 | 4.48 | 4.56 | 4.64 | 4.72 | 4.78  | 4.84  | 4.90  | 4.95  | 5.00  | 5.05  | 5.09  | 5.13  |
| $\infty$ |               | 2.77                       | 3.31 | 3.63 | 3.86 | 4.03 | 4.17 | 4.29 | 4.39 | 4.47 | 4.55 | 4.62 | 4.68  | 4.74  | 4.80  | 4.85  | 4.89  | 4.93  | 4.97  | 5.01  |

(Continued)

**Table B.6 (Continued)**

| <i>k</i><br><i>df</i> (within) |      | <i>q</i> Value When Alpha = .01 |      |      |      |      |      |      |       |       |       |       |       |       |       |       |       |       |       |    |
|--------------------------------|------|---------------------------------|------|------|------|------|------|------|-------|-------|-------|-------|-------|-------|-------|-------|-------|-------|-------|----|
|                                |      | 2                               | 3    | 4    | 5    | 6    | 7    | 8    | 9     | 10    | 11    | 12    | 13    | 14    | 15    | 16    | 17    | 18    | 19    | 20 |
| 1                              | 90.0 | 135                             | 164  | 186  | 202  | 216  | 227  | 237  | 246   | 253   | 260   | 266   | 272   | 277   | 282   | 286   | 290   | 294   | 298   |    |
| 2                              | 14.0 | 19.0                            | 22.3 | 24.7 | 26.6 | 28.2 | 29.5 | 30.7 | 31.7  | 32.6  | 33.4  | 34.1  | 34.8  | 35.4  | 36.0  | 36.5  | 37.0  | 375   | 379   |    |
| 3                              | 8.26 | 10.6                            | 12.2 | 13.3 | 14.2 | 15.0 | 15.6 | 16.2 | 16.7  | 17.1  | 17.5  | 17.9  | 18.2  | 18.5  | 18.8  | 19.1  | 19.3  | 19.5  | 19.8  |    |
| 4                              | 6.51 | 8.12                            | 9.17 | 9.96 | 10.6 | 11.1 | 11.5 | 11.9 | 12.3  | 12.6  | 12.8  | 13.1  | 13.3  | 13.5  | 13.7  | 13.9  | 14.1  | 14.2  | 14.4  |    |
| 5                              | 5.70 | 6.97                            | 7.80 | 8.42 | 8.91 | 9.32 | 9.67 | 9.97 | 10.24 | 10.48 | 10.70 | 10.89 | 11.08 | 11.24 | 11.40 | 11.55 | 11.68 | 11.81 | 11.93 |    |
| 6                              | 5.24 | 6.33                            | 7.03 | 7.56 | 7.97 | 8.32 | 8.61 | 8.87 | 9.10  | 9.30  | 9.49  | 9.65  | 9.81  | 9.95  | 10.08 | 10.21 | 10.32 | 10.43 | 10.54 |    |
| 7                              | 4.95 | 5.92                            | 6.54 | 7.01 | 7.37 | 7.68 | 7.94 | 8.17 | 8.37  | 8.55  | 8.71  | 8.86  | 9.00  | 9.12  | 9.24  | 9.35  | 9.46  | 9.55  | 9.65  |    |
| 8                              | 4.74 | 5.63                            | 6.20 | 6.63 | 6.96 | 7.24 | 7.47 | 7.68 | 7.87  | 8.03  | 8.18  | 8.31  | 8.44  | 8.55  | 8.66  | 8.76  | 8.85  | 8.94  | 9.03  |    |
| 9                              | 4.60 | 5.43                            | 5.96 | 6.35 | 6.66 | 6.91 | 7.13 | 7.32 | 7.49  | 7.65  | 7.78  | 7.91  | 8.03  | 8.13  | 8.23  | 8.32  | 8.41  | 8.49  | 8.57  |    |
| 10                             | 4.48 | 5.27                            | 5.77 | 6.14 | 6.43 | 6.67 | 6.87 | 7.05 | 7.21  | 7.36  | 7.48  | 7.60  | 7.71  | 7.81  | 7.91  | 7.99  | 8.07  | 8.15  | 8.22  |    |
| 11                             | 4.39 | 5.14                            | 5.62 | 5.97 | 6.25 | 6.48 | 6.67 | 6.84 | 6.99  | 7.13  | 7.25  | 7.36  | 7.46  | 7.56  | 7.65  | 7.73  | 7.81  | 7.88  | 7.95  |    |
| 12                             | 4.32 | 5.04                            | 5.50 | 5.84 | 6.10 | 6.32 | 6.51 | 6.67 | 6.81  | 6.94  | 7.06  | 7.17  | 7.26  | 7.36  | 7.44  | 7.52  | 7.59  | 7.66  | 7.73  |    |
| 13                             | 4.26 | 4.96                            | 5.40 | 5.73 | 5.98 | 6.19 | 6.37 | 6.53 | 6.67  | 6.79  | 6.90  | 7.01  | 7.10  | 7.19  | 7.27  | 7.34  | 7.42  | 7.48  | 7.55  |    |
| 14                             | 4.21 | 4.89                            | 5.32 | 5.63 | 5.88 | 6.08 | 6.26 | 6.41 | 6.54  | 6.66  | 6.77  | 6.87  | 6.96  | 7.05  | 7.12  | 7.20  | 7.27  | 7.33  | 7.39  |    |
| 15                             | 4.17 | 4.83                            | 5.25 | 5.56 | 5.80 | 5.99 | 6.16 | 6.31 | 6.44  | 6.55  | 6.66  | 6.76  | 6.84  | 6.93  | 7.00  | 7.07  | 7.14  | 7.20  | 7.26  |    |
| 16                             | 4.13 | 4.78                            | 5.19 | 5.49 | 5.72 | 5.92 | 6.08 | 6.22 | 6.35  | 6.46  | 6.56  | 6.66  | 6.74  | 6.82  | 6.90  | 6.97  | 7.03  | 7.09  | 7.15  |    |
| 17                             | 4.10 | 4.74                            | 5.14 | 5.43 | 5.66 | 5.85 | 6.01 | 6.15 | 6.27  | 6.38  | 6.48  | 6.57  | 6.66  | 6.73  | 6.80  | 6.87  | 6.94  | 7.00  | 7.05  |    |
| 18                             | 4.07 | 4.70                            | 5.09 | 5.38 | 5.60 | 5.79 | 5.94 | 6.08 | 6.20  | 6.31  | 6.41  | 6.50  | 6.58  | 6.65  | 6.72  | 6.79  | 6.85  | 6.91  | 6.96  |    |
| 19                             | 4.05 | 4.67                            | 5.05 | 5.33 | 5.55 | 5.73 | 5.89 | 6.02 | 6.14  | 6.25  | 6.34  | 6.43  | 6.51  | 6.58  | 6.65  | 6.72  | 6.78  | 6.84  | 6.89  |    |
| 24                             | 3.96 | 4.54                            | 4.91 | 5.17 | 5.37 | 5.54 | 5.69 | 5.81 | 5.92  | 6.02  | 6.11  | 6.19  | 6.26  | 6.33  | 6.39  | 6.45  | 6.51  | 6.56  | 6.61  |    |
| 30                             | 3.89 | 4.45                            | 4.80 | 5.05 | 5.24 | 5.40 | 5.54 | 5.65 | 5.76  | 5.85  | 5.93  | 6.01  | 6.08  | 6.14  | 6.20  | 6.26  | 6.31  | 6.36  | 6.41  |    |
| 40                             | 3.82 | 4.37                            | 4.70 | 4.93 | 5.11 | 5.27 | 5.39 | 5.50 | 5.60  | 5.69  | 5.77  | 5.84  | 5.90  | 5.96  | 6.02  | 6.07  | 6.12  | 6.17  | 6.21  |    |
| 60                             | 3.76 | 4.28                            | 4.60 | 4.82 | 4.99 | 5.13 | 5.25 | 5.36 | 5.45  | 5.53  | 5.60  | 5.67  | 5.73  | 5.79  | 5.84  | 5.89  | 5.93  | 5.98  | 6.02  |    |
| 120                            | 3.70 | 4.20                            | 4.50 | 4.71 | 4.87 | 5.01 | 5.12 | 5.21 | 5.30  | 5.38  | 5.44  | 5.51  | 5.56  | 5.61  | 5.66  | 5.71  | 5.75  | 5.79  | 5.83  |    |
| ∞                              | 3.64 | 4.12                            | 4.40 | 4.60 | 4.76 | 4.88 | 4.99 | 5.08 | 5.16  | 5.23  | 5.29  | 5.35  | 5.40  | 5.45  | 5.49  | 5.54  | 5.57  | 5.61  | 5.65  |    |
